# Supplementary material for: Relative Contributions of Specific Activity Histories and Spontaneous Processes to Size Remodeling of Glutamatergic Synapses
Source: PubMed Central journal article supplement (PMC5077109; doi:10.1371/journal.pbio.1002572), 2016-10-24
Supplement: pbio.1002572.s006.pdf [file pbio.1002572.s006.pdf]

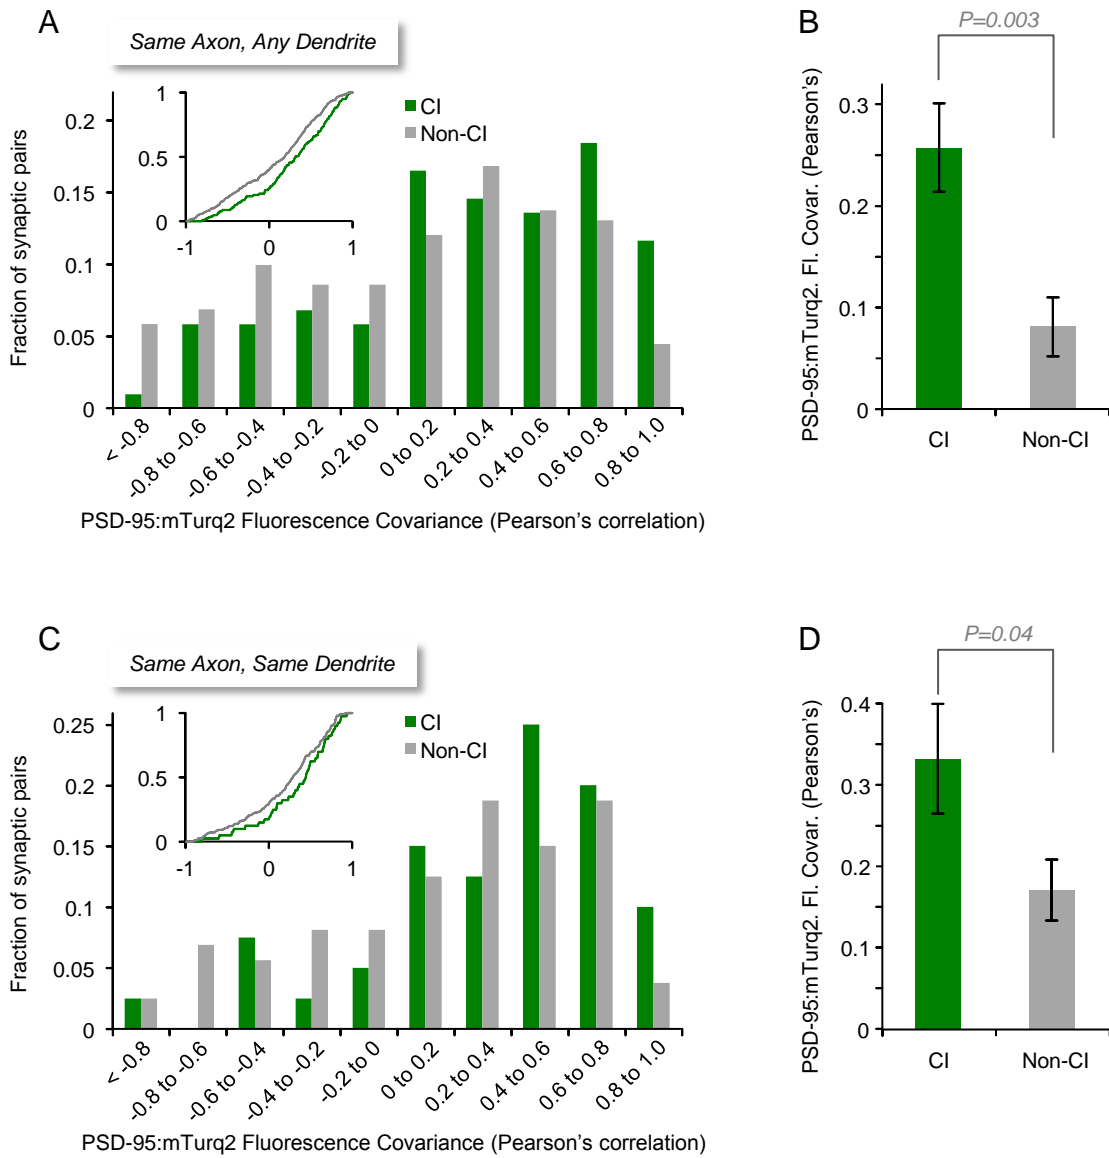

**S5 Fig:** Size remodeling covariance of CI and non-CI synapses in modular networks (high stringency data set, Pearson's correlation)
